# Supplementary material for: Graphene-assisted Ti3C2 MXene-derived ultrathin sodium titanate for capacitive deionization with excellent rate performance and long cycling stability
Source: Royal Society of Chemistry journal article supplement (doi:10.1039/d2ta00449f), 2022-01-01
Supplement: d2ta00449f1.pdf [file d2ta00449f1.pdf]

## Supporting Informaiton

# Graphene-Assisted $\text{Ti}_3\text{C}_2$ MXene-Derived Ultrathin Sodium Titanate for Capacitive deionization with Excellent Rate Performance and Long Cycling Stability

*Xiaojie Shen<sup>1, 2, 3</sup>, Liqing Li<sup>4</sup>, Yuecheng Xiong<sup>3, 5, 6</sup>, Fei Yu<sup>1\*</sup>, Jie Ma<sup>3,4\*</sup>*

1 College of Marine Ecology and Environment, Shanghai Ocean University, Shanghai

201306, P.R. China, E-mail: [fyu@vip.163.com](mailto:fyu@vip.163.com)

2 Department of Environmental Science & Engineering, College of Chemical Engineering, Beijing University of Chemical Technology, 15 North Third Ring Road, Beijing 100029, P. R. China

3 Research Center for Environmental Functional Materials, College of Environmental Science and Engineering, Tongji University, 1239 Siping Road, Shanghai 200092, P.R. China

4 Faculty of Materials Metallurgy and Chemistry, Jiangxi University of Science and Technology, Ganzhou, 341000, P.R. China, E-mail: [liliqing79@126.com](mailto:liliqing79@126.com)

5 Department of Chemistry, City University of Hong Kong, Hong Kong, 999077 China

6 Hong Kong Branch of National Precious Metals Material Engineering Research Center (NPMM), City University of Hong Kong, Hong Kong, 999077 China

## Experimental methods

### 1. Preparation of 2D delaminated $\text{Ti}_3\text{C}_2\text{T}_x$ MXene

One gram of LiF (>98%) was dissolved in 20 mL of 9 M HCl. Then, 1 g of sieved  $\text{Ti}_3\text{AlC}_2$  powders (400 mesh) was added. The mixture was kept at 40°C for 24 h under stirring with a magnetic stirrer. The resulting solid residue was washed several times with deionized water and centrifuged at a speed of 3500 rpm until the pH of the supernatant was approximately 6. The powder was mixed with deionized water and sonicated for 1 h under an ice-bath, through which Ar gas was bubbled. The resulting solution was centrifuged for 40 min at a speed of 4000 rpm. Finally, the 2D delaminated  $\text{Ti}_3\text{C}_2\text{T}_x$  colloidal was obtained. To determine the volumetric density, a syringe was used to pull out 3 ml of the colloidal suspension to filter a film. The remaining suspension was stored in sealed bottles under Ar. After drying in air, it was weighed. For all the work conducted herein, the 2D delaminated  $\text{Ti}_3\text{C}_2\text{T}_x$  MXene solution concentration was approximately 3 mg/mL.

### 2. Material characterization

Scanning electron microscopy (SEM, Hitachi 54800, Japan) and transmission electron microscopy (TEM, JEOL-2010F, Japan) were used to analyze the morphology and microstructure. The crystal structures were analyzed using X-ray diffraction (XRD, D8 Advance, Bruker, Germany) operated at 40 mA and 45 kV with Cu  $\text{K}\alpha$  radiation ( $\lambda=0.15418$  nm, 5°/min, 3-65°). The Brunauer-Emmett-Teller (BET) isotherms and specific surface area (BET surface area) were obtained using a Belsorp Mini-II instrument (Japan) at 77 K. The pore size distribution profile was analyzed using the Barrett-Joyner-Halenda (BJH) model. X-ray photoelectron spectroscopy (XPS Kratos Axis UltraDLD SHIMADZU, Japan) was performed using monochromated Al  $\text{K}\alpha$  X-rays at a base pressure of  $1\times 10^{-9}$  Torr.

### 3. Electrochemical measurement

The AC EDL electrode consisted of 80% active material, 10% acetylene black and a 10% polyvinylidene difluoride (PVDF) binder in N-methyl-2-pyrrolidone (NMP) on a graphite sheet (mass ratio). Constant voltage (CV) and galvanostatic charging-discharging (GCD) tests were performed on a three-electrode electrochemical workstation (CHI660D, Chenhua Instruments Co., China), using Pt as the counter electrode, Ag/AgCl as the reference electrode, and 1 M NaCl as the electrolyte. The specific capacitance (C, F/g) can be obtained from the CV curves using the following

equation:

$$C = \int i dV / \Delta V m v \quad (1)$$

where  $i$  is the current (A),  $m$  is the mass of the active material (g),  $\Delta V$  is the voltage window (V), and  $v$  is the scan rate (V/s).

Electrochemical impedance spectroscopy (EIS) was applied via a CHI660D instrument with a calomel reference electrode, and the data were obtained using a 5mV amplitude in the frequency range from  $10^5$  Hz to 0.1 Hz.

#### 4. Desalination experiments

The electrosorption experiments were conducted in a batch mode system with an HCDI unit cell, which included an activated carbon (AC) anode, an MXene cathode, an anion exchange membrane (AEM) and a cation exchange membrane (CEM). All the experiments were performed by applying a 30 mA/g electric current density with a flow rate of 50 ml/min, and the feed water was pumped through plastic tubes via a peristaltic pump. The conductivity of the solution was monitored by a conductivity meter (METTLER TOLEDO S230, Switzerland). The volume and temperature of the solution were maintained at 45 mL and 25°C, respectively. The relationship between the conductivity and the concentration was calibrated prior to the deionization experiments. The desalination capacity ( $\Gamma$ ), removal rates ( $v$ ) and energy consumption (kWh/kg-NaCl) are defined as follows:

$$\Gamma = (C_0 - C_e) \times V / m_t \quad (2)$$

$$v = \frac{\Gamma}{t} \quad (3)$$

$$\text{Energy consumption} = \frac{i \times \int v dt}{3.6 \times (C_e - C_0) \times V} \quad (4)$$

where  $C_0$  and  $C_e$  (mg/L) are the initial and final NaCl concentrations, respectively,  $m_t$  (g) is the mass of the MXene electrode,  $i$  is the current (A), and  $V$  (L) is the volume of the NaCl solution.

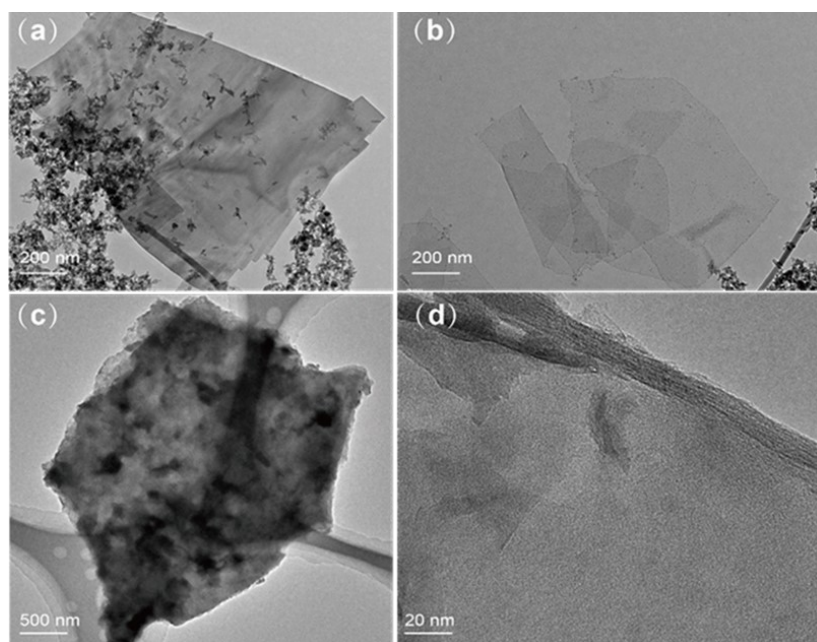

Figure S1. TEM images of Ti<sub>3</sub>C<sub>2</sub>T<sub>x</sub> (a, b) and M-NTO/rGO (c, d).

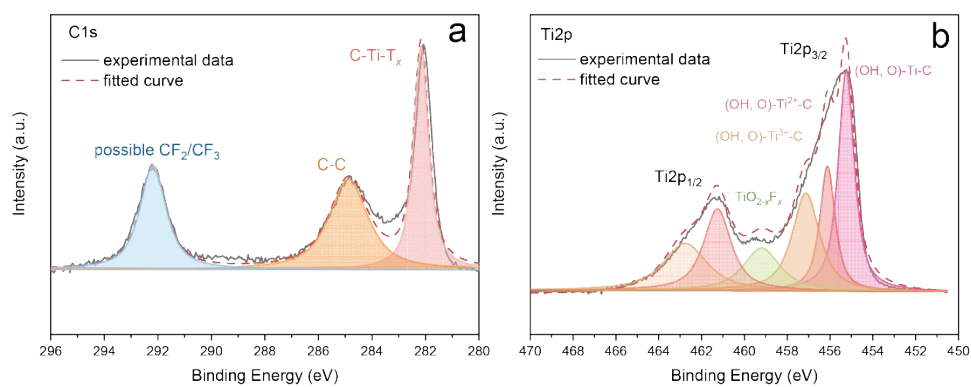

Figure S2 typical high-resolution XPS of C1s (a) and Ti 2p (b) of MXene.

Table.S1 Comparison of various reported electrodes applied for CDI.

| Electrode materials<br>(Cathode)                                | C <sub>0</sub> (mg<br>/L) | Applied<br>voltage/curren<br>t density | SAC (mg/g) | Long<br>term-<br>stability | Ref.         |
|-----------------------------------------------------------------|---------------------------|----------------------------------------|------------|----------------------------|--------------|
| <b>MnO<sub>2</sub></b>                                          | 500                       | 1.4                                    | 14.9       | 350                        | [1]          |
| <b>Hybrid-MnO<sub>2</sub></b>                                   | 850                       | 1.2                                    | 27.3       | -                          | [2]          |
| <b>Na<sub>4</sub>Mn<sub>9</sub>O<sub>18</sub></b>               | 580                       | 1.2                                    | 31.2       | -                          | [3]          |
| <b>aNa<sub>2</sub>FeP<sub>2</sub>O<sub>7</sub></b>              | 580                       | 1.2                                    | 30.2       | -                          | [4]          |
| <b>AC-Ti-S</b>                                                  | 500                       | 1.2                                    | 10         | -                          | [5]          |
| <b>Ag coated carbon<br/>composite</b>                           | 580                       | 0.7                                    | 15.6       | -                          | [6]          |
| <b>Grapheme@Na<sub>4</sub>Ti<sub>9</sub><br/>O<sub>20</sub></b> | 250                       | 1.4                                    | 41.8       | -                          | [7]          |
| <b>M-NTO/rGO</b>                                                | 1000                      | 30mA/g/1.4V                            | 57.57      | 100                        | This<br>work |

## References

- [1] Wu, T.; Wang, G.; Wang, S.; Zhan, F.; Fu, Y.; Qiao, H.; Qiu, J., Highly Stable Hybrid Capacitive Deionization with a MnO<sub>2</sub> Anode and a Positively Charged Cathode. *Environmental Science & Technology Letters* **2018**, 5, (2), 98-102.
- [2] Byles, B. W.; Cullen, D. A.; More, K. L.; Pomerantseva, E., Tunnel structured manganese oxide nanowires as redox active electrodes for hybrid capacitive deionization. *Nano Energy* **2018**, 44, 476-488.
- [3] Lee, J.; Kim, S.; Kim, C.; Yoon, J., Hybrid capacitive deionization to enhance the desalination performance of capacitive techniques. *Energy & Environmental Science* **2014**, 7, (11), 3683-3689.
- [4] Kim, S.; Lee, J.; Kim, C.; Yoon, J., Na<sub>2</sub>FeP<sub>2</sub>O<sub>7</sub> as a Novel Material for Hybrid Capacitive Deionization. *Electrochimica Acta* **2016**, 203, 265-271.
- [5] Min, B. H.; Choi, J.-H.; Jung, K. Y., Improved capacitive deionization of sulfonated carbon/titania hybrid electrode. *Electrochimica Acta* **2018**, 270, 543-551.
- [6] Yoon, H.; Lee, J.; Kim, S.; Yoon, J., Hybrid capacitive deionization with Ag coated carbon composite electrode. *Desalination* **2017**, 422, 42-48.
- [7] Zhou, F.; Gao, T.; Luo, M.; Li, H., Heterostructured graphene@Na<sub>4</sub>Ti<sub>9</sub>O<sub>20</sub> nanotubes for asymmetrical capacitive deionization with ultrahigh desalination capacity. *Chemical Engineering Journal* **2018**, 343, 8-15.
